# Supplementary material for: Genome-Based Genotype × Environment Prediction Enhances Potato (Solanum tuberosum L.) Improvement Using Pseudo-Diploid and Polysomic Tetraploid Modeling
Source: PubMed Central journal article supplement (PMC8859116; doi:10.3389/fpls.2022.785196), 2022-02-07
Supplement: Data_Sheet_1.pdf [file Data_Sheet_1.pdf]

**Table S1.** SLU's Svensk potatisförädling breeding clones and cultivars available for growing in Sweden used for field trials in Helgegården, Mosslunda and Umeå.

| Cultivar or Breeding Clone | Country | Released or Crossing Year |
|----------------------------|---------|---------------------------|
| Belinda                    | AUT     | 1979                      |
| Ditta                      | AUT     | 1989                      |
| Kerkauer Kipfler           | AUT     | N/A                       |
| Linzer Delikatess          | AUT     | 1975                      |
| Afra                       | BRD     | 1990                      |
| Agila                      | BRD     | 2006                      |
| Agria                      | BRD     | 1985                      |
| Alexandra                  | BRD     | 2008                      |
| Allians                    | BRD     | 2003                      |
| Almonda                    | BRD     | 2011                      |
| Annalena                   | BRD     | N/A                       |
| Antonia                    | BRD     | 2008                      |
| Baby Lou                   | BRD     | N/A                       |
| Bellarosa                  | BRD     | 2004                      |
| Belmonda                   | BRD     | 2010                      |
| Birgit                     | BRD     | 2009                      |
| Blaue Annelise             | BRD     | N/A                       |
| Centifolia                 | BRD     | 1919                      |
| Cilena                     | BRD     | 1981                      |
| Concordia                  | BRD     | 2008                      |
| Corinna                    | BRD     | N/A                       |
| Edison                     | BRD     | N/A                       |
| Finka                      | BRD     | 2001                      |

|                   |     |      |
|-------------------|-----|------|
| Gala              | BRD | 2002 |
| Goldmarie         | BRD | N/A  |
| Granola           | BRD | 1975 |
| Gunda             | BRD | 1999 |
| Hansa             | BRD | 1957 |
| Heiderot          | BRD | 1977 |
| Jelly             | BRD | 2002 |
| Jule              | BRD | N/A  |
| Julinka           | BRD | N/A  |
| Krone             | BRD | 2002 |
| Laura             | BRD | 1998 |
| Lea               | BRD | N/A  |
| Leyla             | BRD | 1988 |
| Lilly             | BRD | N/A  |
| Linda             | BRD | 1974 |
| Ludmilla          | BRD | 2008 |
| Marena            | BRD | 1995 |
| Merle             | BRD | N/A  |
| Nandina           | BRD | 2010 |
| Natalia           | BRD | N/A  |
| Natascha          | BRD | 2006 |
| Nicola            | BRD | 1973 |
| Odenwalder Blaue | BRD | 1908 |
| Orla              | BRD | 2001 |
| Otolia            | BRD | N/A  |
| Papageno          | BRD | 2019 |
| Pocahontas        | BRD | N/A  |

|                  |     |      |
|------------------|-----|------|
| Princess         | BRD | 1998 |
| Quarta           | BRD | 1979 |
| Queen Anne       | BRD | 2012 |
| Ragna            | BRD | 1982 |
| Ramona           | BRD | 1988 |
| Red Emmalie      | BRD | N/A  |
| Red Fantasy      | BRD | 2006 |
| Red Lady         | BRD | 2004 |
| Regina           | BRD | 2009 |
| Rodriga          | BRD | 2005 |
| Rosara           | BRD | 1990 |
| Rossini          | BRD | N/A  |
| Salad Blue       | BRD | N/A  |
| Selma            | BRD | 1972 |
| Sieglinde        | BRD | 1935 |
| Solara           | BRD | 1989 |
| Solist           | BRD | 1999 |
| Sunshine         | BRD | N/A  |
| Talent           | BRD | 2006 |
| Torenia          | BRD | N/A  |
| Venezia          | BRD | 2009 |
| Verdi            | BRD | 2003 |
| Anuschka         | BRD | 2004 |
| Belana           | BRD | 2000 |
| Quadriga         | BRD | 2005 |
| Blaue St. Galler | CH  | N/A  |
| Madeira          | CH  | N/A  |

|                   |     |      |
|-------------------|-----|------|
| Adretta           | DDR | 1975 |
| Karlana           | DDR | 1988 |
| Aeggeblomme       | DK  | N/A  |
| Folva             | DK  | 1989 |
| Tammiston         | FIN | 1930 |
| Timo              | FIN | 1975 |
| Altesse           | FRA | 2000 |
| Amandine          | FRA | 1993 |
| Anais             | FRA | 1997 |
| Aura              | FRA | 1951 |
| Belle de Fontenay | FRA | 1885 |
| Blue Belle        | FRA | 2008 |
| Charlotte         | FRA | 1981 |
| Cherie            | FRA | 1997 |
| Cheyenne          | FRA | N/A  |
| Dalida            | FRA | N/A  |
| Gaiane            | FRA | 2018 |
| Glorietta         | FRA | 2020 |
| Gwenne            | FRA | 2011 |
| Juliette          | FRA | 1997 |
| La Ratte          | FRA | 1965 |
| Maestro           | FRA | 2001 |
| Marine            | FRA | 1994 |
| Monique           | FRA | 2020 |
| Vitelotte         | FRA | 1815 |
| Yona              | FRA | 2008 |
| Zoe               | FRA | 2018 |

|                       |     |      |
|-----------------------|-----|------|
| Anya                  | GB  | 1996 |
| Arran Pilot           | GB  | 1930 |
| Arran Victory         | GB  | 1918 |
| British Queen         | GB  | 1984 |
| Casa Blanca           | GB  | 2010 |
| Emily                 | GB  | N/A  |
| Golden Wonder         | GB  | 1906 |
| Highland Burgundy Red | GB  | 1930 |
| Inca Bella            | GB  | 2010 |
| International Kidney  | GB  | 1879 |
| King Edward           | GB  | 1902 |
| Kingsman              | GB  | N/A  |
| Maris Bard            | GB  | 1972 |
| Maris Peer            | GB  | 1962 |
| Marys Rose            | GB  | 2001 |
| Mayan Gold            | GB  | 2001 |
| Mayan Rose            | GB  | N/A  |
| Pink Fir Apple        | GB  | 1850 |
| Red Duke of York      | GB  | N/A  |
| Rocket                | GB  | 1987 |
| Sarpo Una             | GB  | 2010 |
| Shetland Black        | GB  | N/A  |
| Swift                 | GB  | 1994 |
| Valor                 | GB  | 1993 |
| Foxton                | GB  | 1981 |
| Sarpo Mira            | HUN | 2003 |
| Cara                  | IRL | 1973 |

|             |     |      |
|-------------|-----|------|
| Colleen     | IRL | 1991 |
| Galactica   | IRL | 2003 |
| Rooster     | IRL | 1990 |
| Setanta     | IRL | 2004 |
| Raudar      | IS  | 1800 |
| 7 FOUR 7    | NDL | 2014 |
| A           | NDL | 2018 |
| Allstar     | NDL | 2015 |
| Alouette    | NDL | 2014 |
| Annabelle   | NDL | 2001 |
| Anouk       | NDL | 2014 |
| Apache      | NDL | 1986 |
| Arielle     | NDL | 1999 |
| Arrow       | NDL | 2004 |
| Arsenal     | NDL | 2009 |
| Asperges    | NDL | N/A  |
| Asterix     | NDL | 1991 |
| Avenue      | NDL | 2010 |
| Bintje      | NDL | 1910 |
| Bionica     | NDL | 2008 |
| Carolus     | NDL | 2012 |
| Challenger  | NDL | 2008 |
| Colomba     | NDL | 2011 |
| Connect     | NDL | 2012 |
| Dartiest    | NDL | 2012 |
| Desiree     | NDL | 1962 |
| Eigenheimer | NDL | 1885 |

|              |     |      |
|--------------|-----|------|
| Fontane      | NDL | 1999 |
| Frieslander  | NDL | 1990 |
| Hind         | NDL | 2018 |
| Inova        | NDL | 1999 |
| Jazzy        | NDL | 2010 |
| Kuras        | NDL | 1996 |
| Labella      | NDL | 2008 |
| B            | NDL | 2019 |
| C            | NDL | 2007 |
| D            | NDL | 2010 |
| E            | NDL | 2008 |
| Lady Christl | NDL | 1996 |
| F            | NDL | 1996 |
| G            | NDL | 1988 |
| Laperla      | NDL | 2010 |
| Marabel      | NDL | 1993 |
| Marilyn      | NDL | 2006 |
| Masai        | NDL | 2014 |
| H            | NDL | 2001 |
| Minerva      | NDL | 1988 |
| Montana      | NDL | 1998 |
| Monte Carlo  | NDL | 2009 |
| I            | NDL | 2007 |
| Nofy         | NDL | 2017 |
| J            | NDL | 2007 |
| Purple Rain  | NDL | 2019 |
| Record       | NDL | 1932 |

|            |         |      |
|------------|---------|------|
| Saprodi    | NDL     | 2014 |
| Serum Star | NDL     | N/A  |
| Sevilla    | NDL     | 2018 |
| K          | NDL     | 2005 |
| Sunita     | NDL     | 2014 |
| Taisiya    | NDL     | 2011 |
| Tarzan     | NDL     | 1989 |
| Theresa    | NDL     | 1979 |
| Triplo     | NDL     | 2000 |
| Twister    | NDL     | 2017 |
| Ultra      | NDL     | 1999 |
| Marius     | NOR/POL | 1893 |
| 0003022    | SLU     | 2000 |
| 0101011    | SLU     | 2001 |
| 0502047    | SLU     | 2005 |
| 1201001    | SLU     | 2012 |
| 1209001    | SLU     | 2012 |
| 1211009    | SLU     | 2012 |
| 1212001    | SLU     | 2012 |
| 1213008    | SLU     | 2012 |
| 1312011    | SLU     | 2013 |
| 1314013    | SLU     | 2013 |
| 1314015    | SLU     | 2013 |
| 1326009    | SLU     | 2013 |
| 1337013    | SLU     | 2013 |
| 1337015    | SLU     | 2013 |
| 1337017    | SLU     | 2013 |



|         |         |      |
|---------|---------|------|
| 1342004 | SLU     | 2013 |
| 1402001 | SLU     | 2014 |
| 1402003 | SLU     | 2014 |
| 1402009 | SLU     | 2014 |
| 1410004 | SLU     | 2014 |
| 1410005 | SLU     | 2014 |
| 1414011 | SLU     | 2014 |
| 1415001 | SLU     | 2014 |
| 1415003 | SLU     | 2014 |
| 1419002 | SLU     | 2014 |
| 1419004 | SLU     | 2014 |
| 1419006 | SLU     | 2014 |
| 1419009 | SLU     | 2014 |
| 1419010 | SLU     | 2014 |
| 1429006 | SLU     | 2014 |
| 1433004 | SLU     | 2014 |
| 1433005 | SLU     | 2014 |
| 1433006 | SLU     | 2014 |
| 1438004 | SLU     | 2014 |
| 1442007 | SLU     | 2014 |
| 1452001 | SLU     | 2014 |
| 2-IV-4  | SLU CWR | N/A  |
| 2-IV-6  | SLU CWR | N/A  |
| N5-18   | SLU CWR | N/A  |
| 16      | SLU*    |      |
| 96      | SLU*    |      |
| 97      | SLU*    |      |

|                |      |      |
|----------------|------|------|
| 107            | SLU* |      |
| 121            | SLU* |      |
| 127            | SLU* |      |
| 131            | SLU* |      |
| 188            | SLU* |      |
| Blå Mandel     | SWE  | N/A  |
| Blaue Schweden | SWE  | 1800 |
| Mandel         | SWE  | N/A  |
| Maria          | SWE  | 1972 |
| Perlo          | SWE  | 2007 |
| Röda krokär    | SWE  | 1800 |
| Sparris        | SWE  | N/A  |
| Tärendö        | SWE  | N/A  |
| Magda          | TCH  | 2000 |
| Early Puritan  | USA  | 1988 |
| Early Rose     | USA  | 1897 |
| Purple Majesty | USA  | N/A  |

AUT = Austria, BRD = Germany, CH = Switzerland, DDR = former East Germany, DK = Denmark, FIN = Finland, FRA = France, GB = Great Britain, IRL = Ireland, IS = Iceland, NDL = The Netherlands, NOR/POL = Norway/Poland, SWE = Sweden, TCH = Czechia, USA = United States of America, N/A = unavailable, SLU CWR = SLU's crop wild relative-derived breeding clone, SLU\* = SLU's chip potato breeding clone

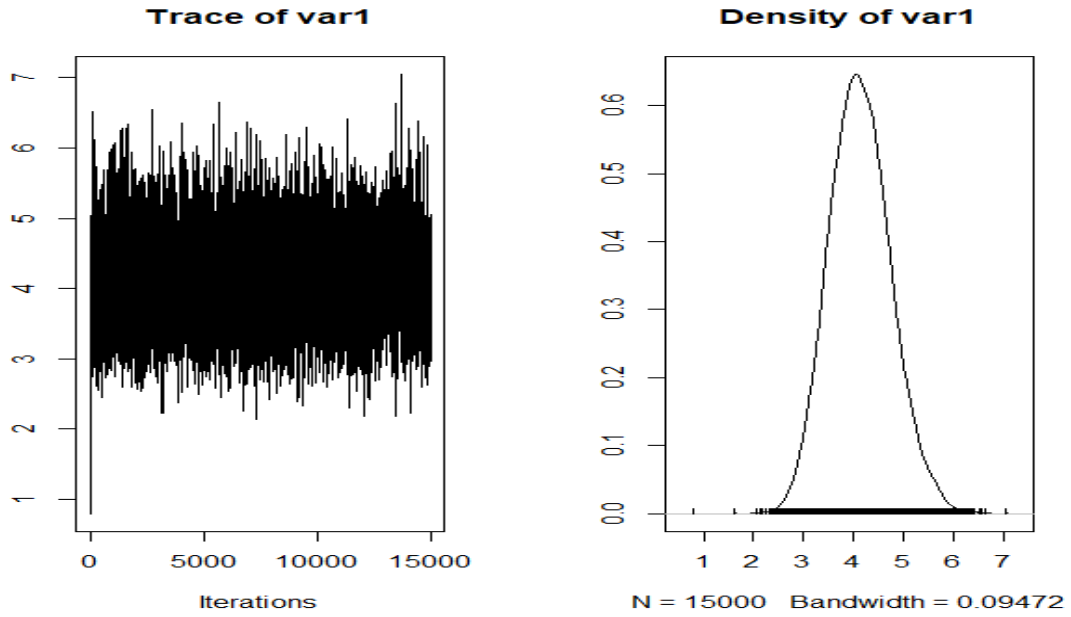

**Figure S1.** Markov Change Monte Carlo (MCMC) diagnostics. Trace of variance and density distribution indicates whether a large portion of the MCMC sample has been drawn from distributions that are significantly different from the target distribution.

**Table S2.** Phenotypic correlations between 3 sites for 6 traits (total tuber weight, and weight for tubers < 40 mm, 40–50 mm, 50–60 mm, > 60 mm, and starch).

Total tuber weigth

|             | Helgegården | Mosslunda  | Umeå       |
|-------------|-------------|------------|------------|
| Helgegården | 1           | 0.6595865  | 0.69971255 |
| Mosslunda   | 0.65958650  | 1          | 0.64876088 |
| Umeå        | 0.69971255  | 0.64876088 | 1          |

Weigth for tubers < 40 mm

|             | Helgegården | Mosslunda  | Umeå       |
|-------------|-------------|------------|------------|
| Helgegården | 1           | 0.59940731 | 0.68341362 |
| Mosslunda   | 0.59940731  | 1          | 0.57811271 |
| Umeå        | 0.68341362  | 0.57811271 | 1          |

Weigth for tubers 40–50 mm

|             | Helgegården | Mosslunda  | Umeå       |
|-------------|-------------|------------|------------|
| Helgegården | 1           | 0.44996004 | 0.12189786 |
| Mosslunda   | 0.44996004  | 1          | 0.37558829 |
| Umeå        | 0.12189786  | 0.37558829 | 1          |

Weigth for tubers 50–60 mm

|             | Helgegården | Mosslunda  | Umeå       |
|-------------|-------------|------------|------------|
| Helgegården | 1           | 0.53769307 | 0.44646189 |
| Mosslunda   | 0.53769307  | 1          | 0.69092806 |
| Umeå        | 0.44646189  | 0.69092806 | 1          |

Weigth for tubers > 60 mm

|             | Helgegården | Mosslunda  | Umeå       |
|-------------|-------------|------------|------------|
| Helgegården | 1           | 0.69371655 | 0.69838046 |
| Mosslunda   | 0.69371655  | 1          | 0.66104315 |
| Umeå        | 0.69838046  | 0.66104315 | 1          |

Starch

|             | Helgegården | Mosslunda  | Umeå       |
|-------------|-------------|------------|------------|
| Helgegården | 1           | 0.83608897 | 0.85104941 |
| Mosslunda   | 0.83608897  | 1          | 0.77242877 |
| Umeå        | 0.85104941  | 0.77242877 | 1          |
